CORRECTION

# Correction: Experimental research on the structural instability mechanism and the effect of multi-echelon support of deep roadways in a kilometre-deep well

Rui Peng, Xiangrui Meng, Guangming Zhao, Yingming Li, Jianming Zhu

The following information is missing from the Funding section: This research is supported by the Science and Technology Research for Heibei University (Grant no. QN2018302) to RP.

## Reference

1. Peng R, Meng X, Zhao G, Li Y, Zhu J (2018) Experimental research on the structural instability mechanism and the effect of multi-echelon support of deep roadways in a kilometre-deep well. PLoS ONE 13 (2): e0192470. <https://doi.org/10.1371/journal.pone.0192470> PMID: 29447180

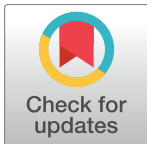

## OPEN ACCESS

**Citation:** Peng R, Meng X, Zhao G, Li Y, Zhu J (2018) Correction: Experimental research on the structural instability mechanism and the effect of multi-echelon support of deep roadways in a kilometre-deep well. PLoS ONE 13(6): e0199490. <https://doi.org/10.1371/journal.pone.0199490>

**Published:** June 18, 2018

**Copyright:** © 2018 Peng et al. This is an open access article distributed under the terms of the [Creative Commons Attribution License](https://creativecommons.org/licenses/by/4.0/), which permits unrestricted use, distribution, and reproduction in any medium, provided the original author and source are credited.
